# Supplementary material for: Cation–anion interaction directed dual-mode switchable mechanochromic luminescence
Source: Royal Society of Chemistry journal article supplement (doi:10.1039/c7tc02497e), 2017-01-01

## ***Supporting Information***

### ***Cation–anion interaction directed dual-mode switchable mechanochromic luminescence***

Gaocan Li,<sup>‡\*</sup> Yangyang Xu,<sup>‡</sup> Qunshou Kong, Weihua Zhuang and Yunbing Wang\*

National Engineering Research Center for Biomaterials, Sichuan University, 29  
Wangjiang Road, Chengdu 610064, China

\*E-mail: gaocanli@scu.edu.cn; yunbing.wang@scu.edu.cn

<sup>‡</sup>These authors contribute equally to this work.

## I. Organic mechanochromic luminescent materials based on perylene skeleton

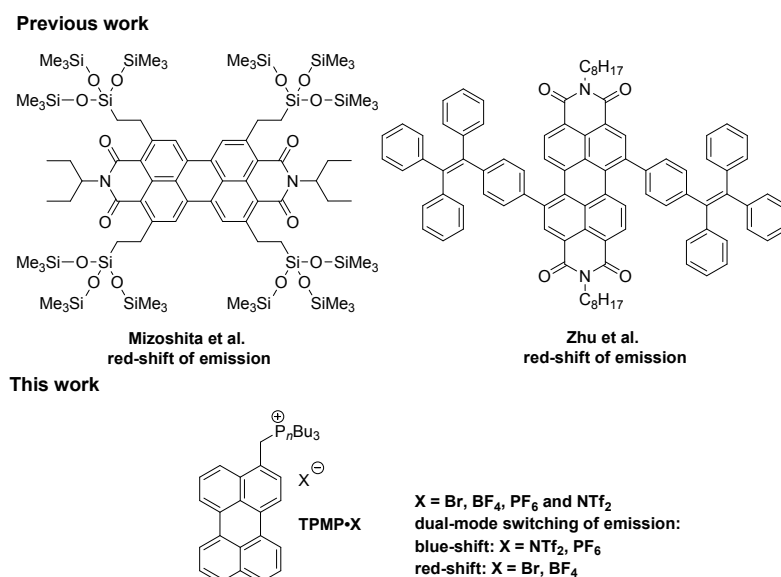

**Scheme S1** Organic mechanochromic luminescent materials based on perylene skeleton.

## II. X-Ray structure determination

Block crystals of tributyl(perylen-3-ylmethyl)phosphonium bromide (**TPMP·Br**), and tributyl(perylen-3-ylmethyl)phosphonium bis((trifluoromethyl)sulfonyl)amide (**TPMP·NTf<sub>2</sub>**) were obtained from MeOH/Et<sub>2</sub>O solutions in refrigerator, respectively. X-Ray single-crystal diffraction data were collected on a Oxford Xcalibur E CCD area-detector diffractometer with graphite monochromated Mo K $\alpha$  radiation ( $\lambda = 0.71073$  Å) with  $\omega$  scan mode. The crystal parameters, data collection and refinement results for the compound are summarized in Table S1.

**Table S1. Crystallographic Data for TPMP·X.**

| TPMP·X             | TPMP·Br                             | TPMP·PF <sub>6</sub>                                          | TPMP·NTf <sub>2</sub>                                                          |
|--------------------|-------------------------------------|---------------------------------------------------------------|--------------------------------------------------------------------------------|
| empirical formula  | C <sub>33</sub> H <sub>40</sub> BrP | C <sub>33</sub> H <sub>40</sub> F <sub>6</sub> P <sub>2</sub> | C <sub>35</sub> H <sub>39</sub> F <sub>6</sub> NO <sub>4</sub> PS <sub>2</sub> |
| formula weight (M) | 547.52                              | 612.59                                                        | 746.76                                                                         |
| temperature (K)    | 293(2)                              | 133.84(10)                                                    | 293(2)                                                                         |
| wavelength (Å)     | 0.71073                             | 0.71073                                                       | 0.71073                                                                        |
| crystal system     | monoclinic                          | orthorhombic                                                  | monoclinic                                                                     |
| space group        | <i>P</i> -1                         | <i>P</i> -2n                                                  | <i>P</i> -1                                                                    |
| <i>a</i> (Å)       | 18.0756(10)                         | 19.3848(5)                                                    | 9.7167(3)                                                                      |
| <i>b</i> (Å)       | 9.2768(5)                           | 18.6400(5)                                                    | 17.3160(6)                                                                     |
| <i>c</i> (Å)       | 19.0097(10)                         | 16.7392(4)                                                    | 21.7331(7)                                                                     |
| $\alpha$ (deg)     | 90                                  | 90                                                            | 90                                                                             |
| $\beta$ (deg)      | 95.079(5)                           | 90                                                            | 102.549(3)                                                                     |
| $\gamma$ (deg)     | 90                                  | 90                                                            | 90                                                                             |

|                                         |                |                |                |
|-----------------------------------------|----------------|----------------|----------------|
| $V$ (Å <sup>3</sup> )                   | 3175.1(3)      | 6048.4(3)      | 3569.3(2)      |
| $Z$                                     | 4              | 8              | 4              |
| $D_{\text{calc}}$ (g cm <sup>-3</sup> ) | 1.145          | 1.345          | 1.390          |
| $\mu$ (mm <sup>-1</sup> )               | 1.362          | 1.817          | 0.264          |
| $F(000)$                                | 1152.0         | 2576.0         | 1556.0         |
| crystal size (mm)                       | 0.40×0.35×0.30 | 0.70×0.40×0.30 | 0.40×0.20×0.20 |
| reflns collected                        | 14212          | 18498          | 18580          |
| unique reflns                           | 6471           | 5901           | 7283           |
| $R_{\text{int}}$                        | 0.0232         | 0.0278         | 0.0205         |
| $R_1, wR_2$ (all data)                  | 0.0705, 0.2291 | 0.1403, 0.4326 | 0.0939, 0.2986 |

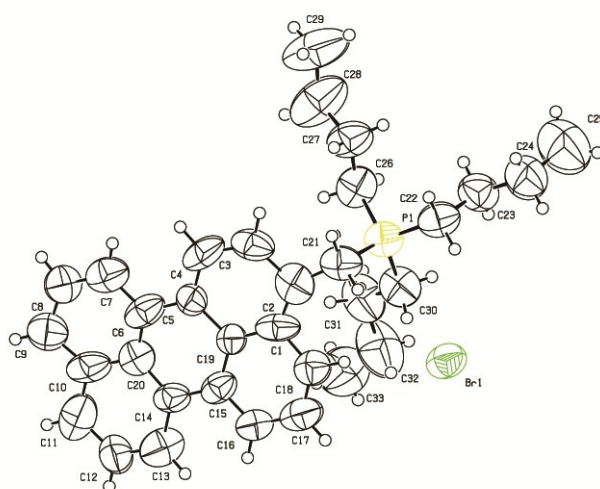

**Figure S1.** ORTEP drawing of the single crystal of **TPMP·Br** with 50% probability thermal ellipsoids.

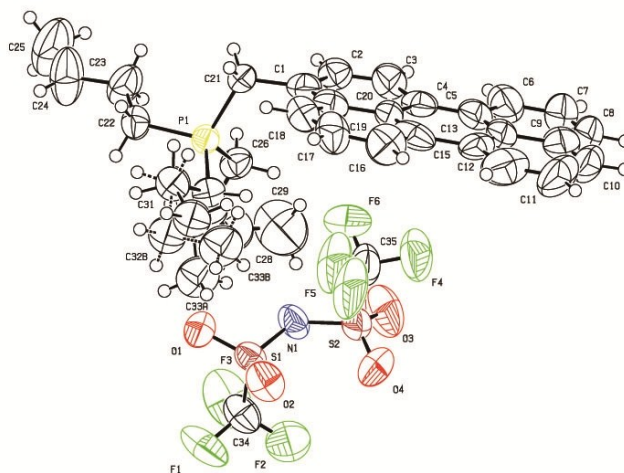

**Figure S2.** ORTEP drawing of the single crystal of **TPMP·NTf<sub>2</sub>** with 50% probability thermal ellipsoids.

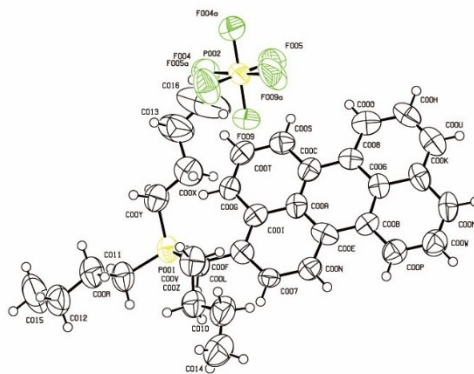

**Figure S3.** ORTEP drawing of the single crystal of **TPMP·PF<sub>6</sub>** with 50% probability thermal ellipsoids.

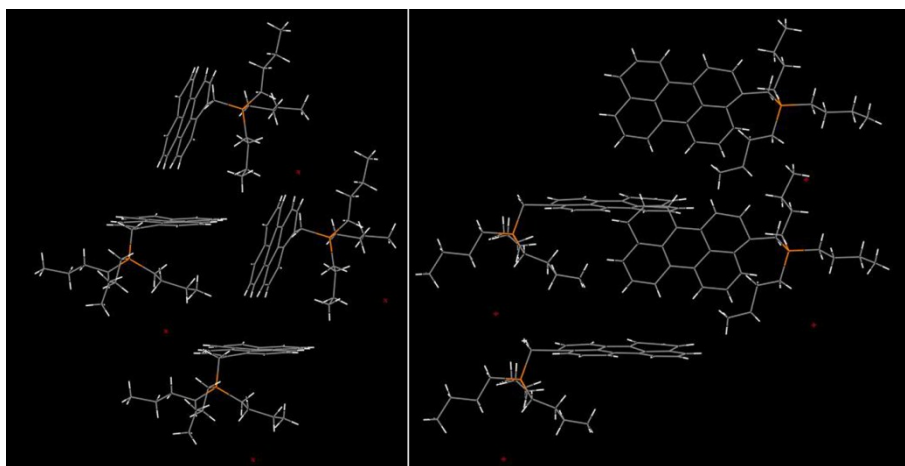

**Figure S4.** Molecular stacking of the single crystals of **TPMP·Br**: side view (left) and front view (right).

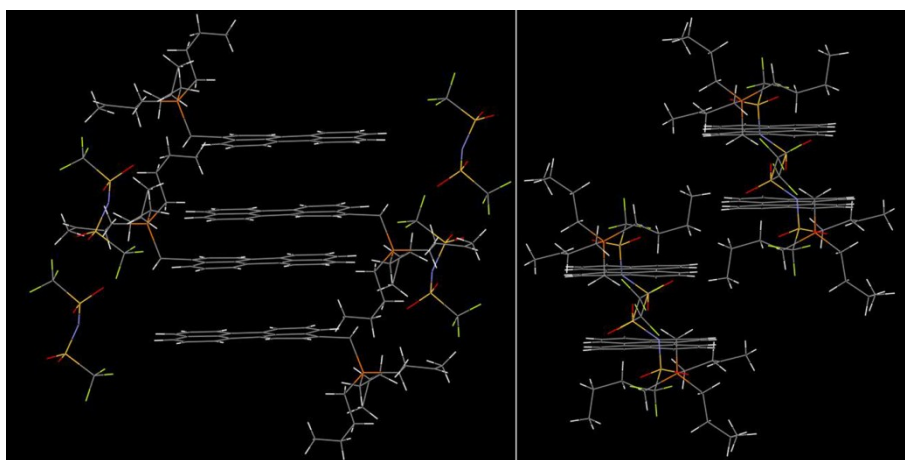

**Figure S5.** Molecular stacking of the single crystals of **TPMP·NTf<sub>2</sub>**: side view (left) and front view (right).

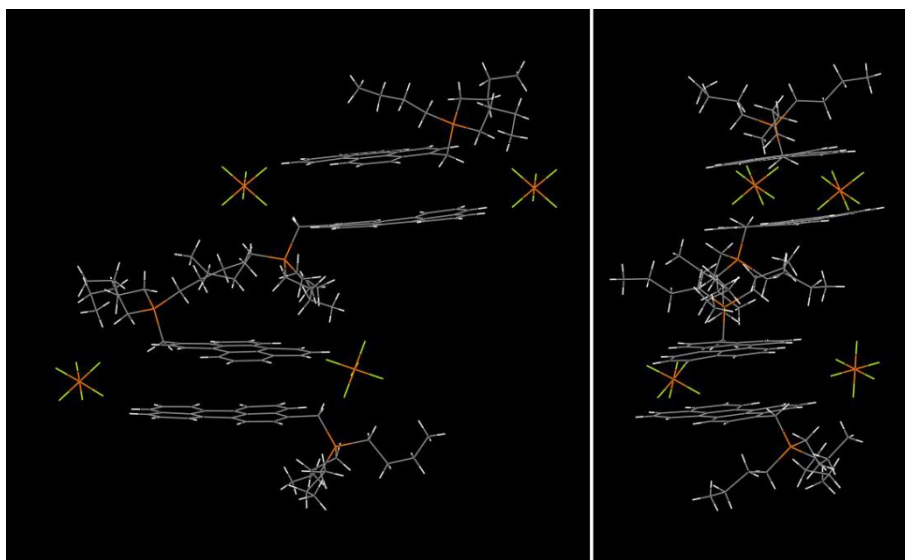

**Figure S6.** Molecular stacking of the single crystals of **TPMP·PF<sub>6</sub>**; side view (left) and front view (right).

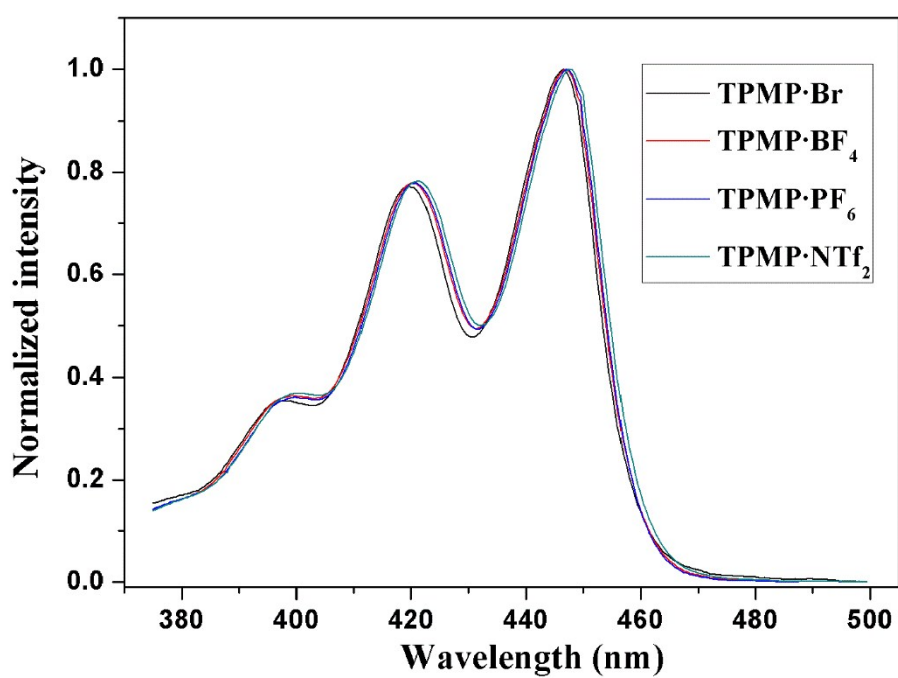

**Figure S7.** Normalized absorption spectra of phosphonium salts **TPMP·X** ( $\text{CH}_2\text{Cl}_2$  solution, 5.0  $\mu\text{M}$ ).

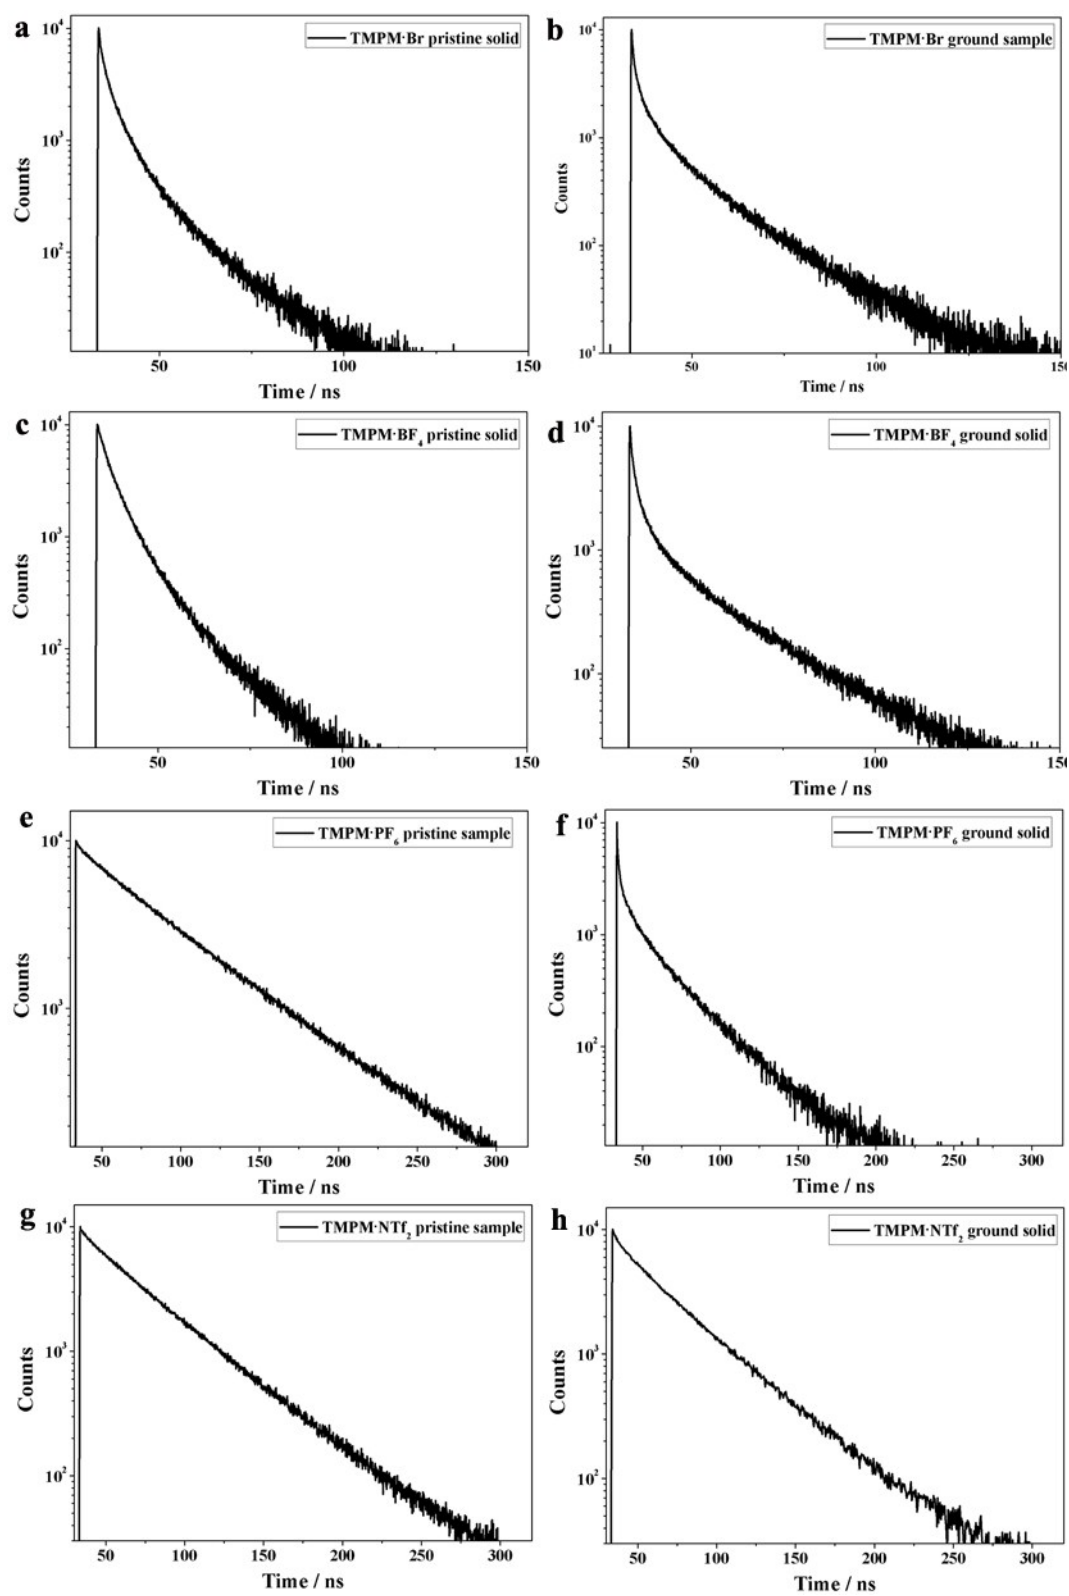

**Figure S8.** Luminescence decay profiles of **TPMP·X** in different states.

### III. Copies of $^1\text{H}$ , $^{13}\text{C}$ , $^{19}\text{F}$ and $^{31}\text{P}$ NMR spectra

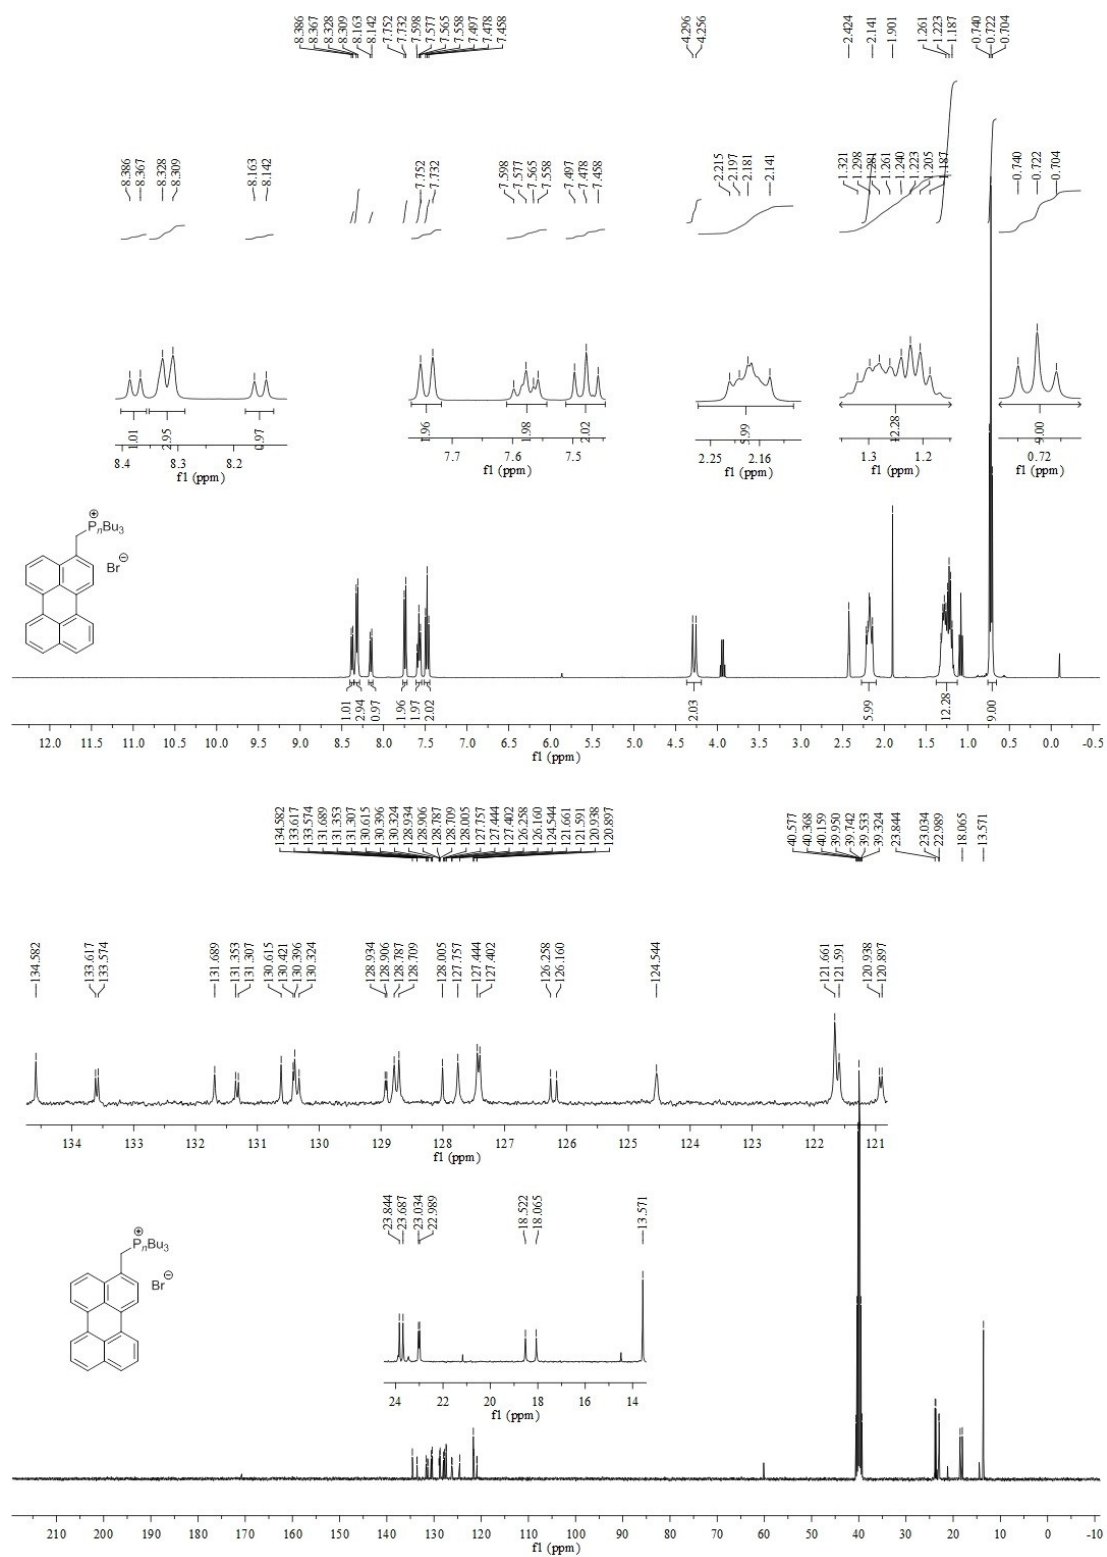

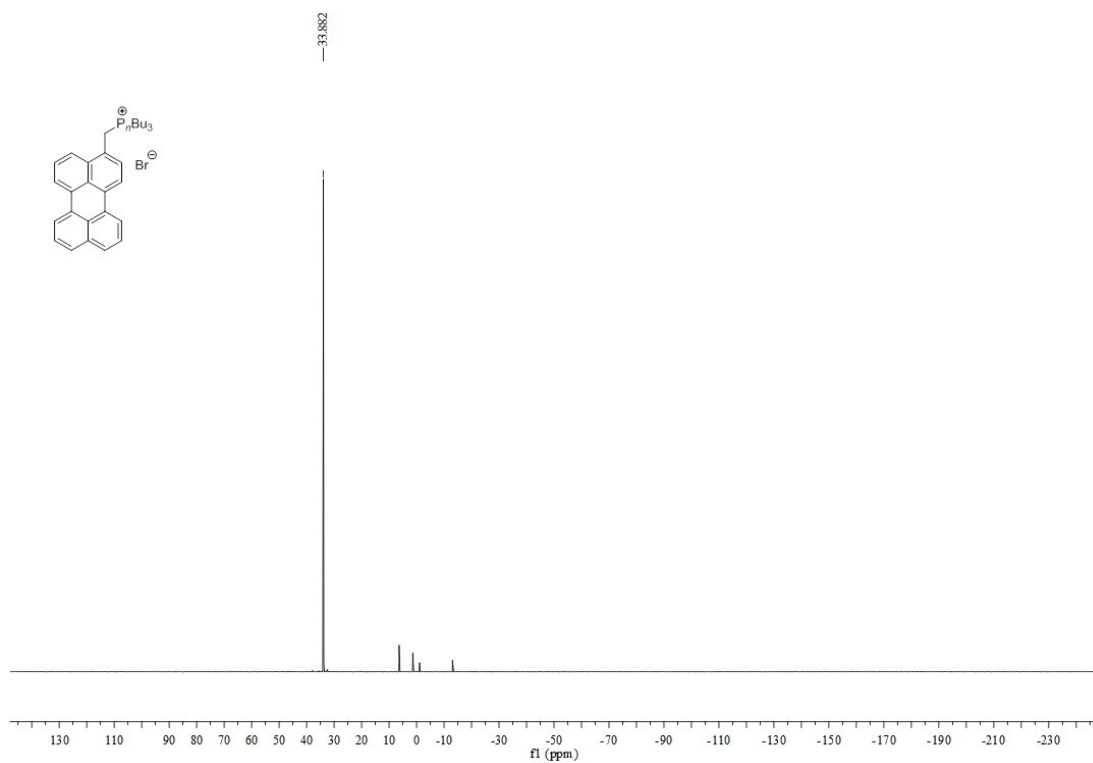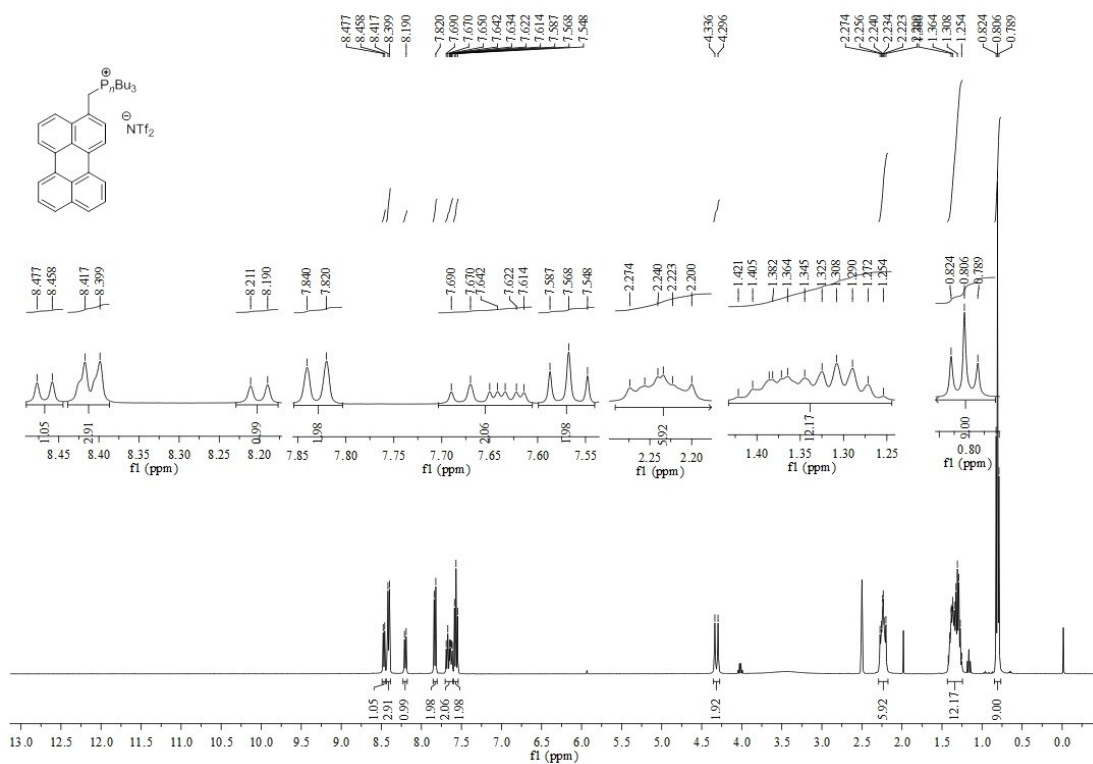





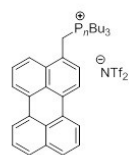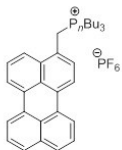



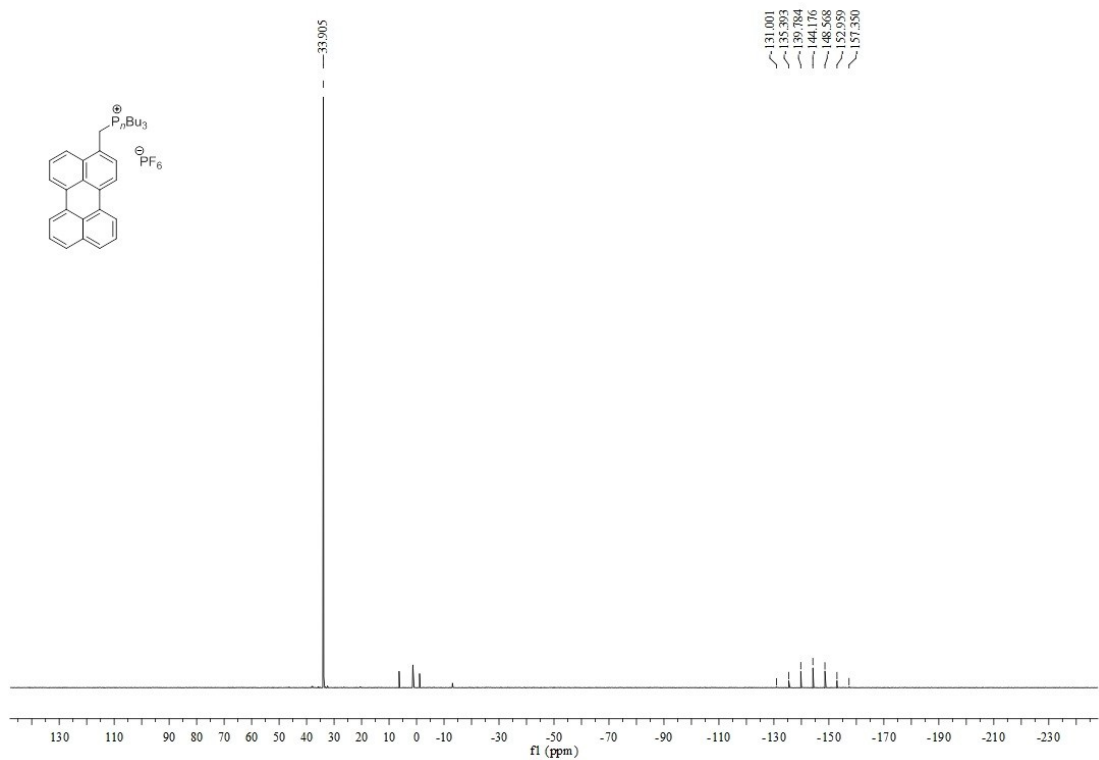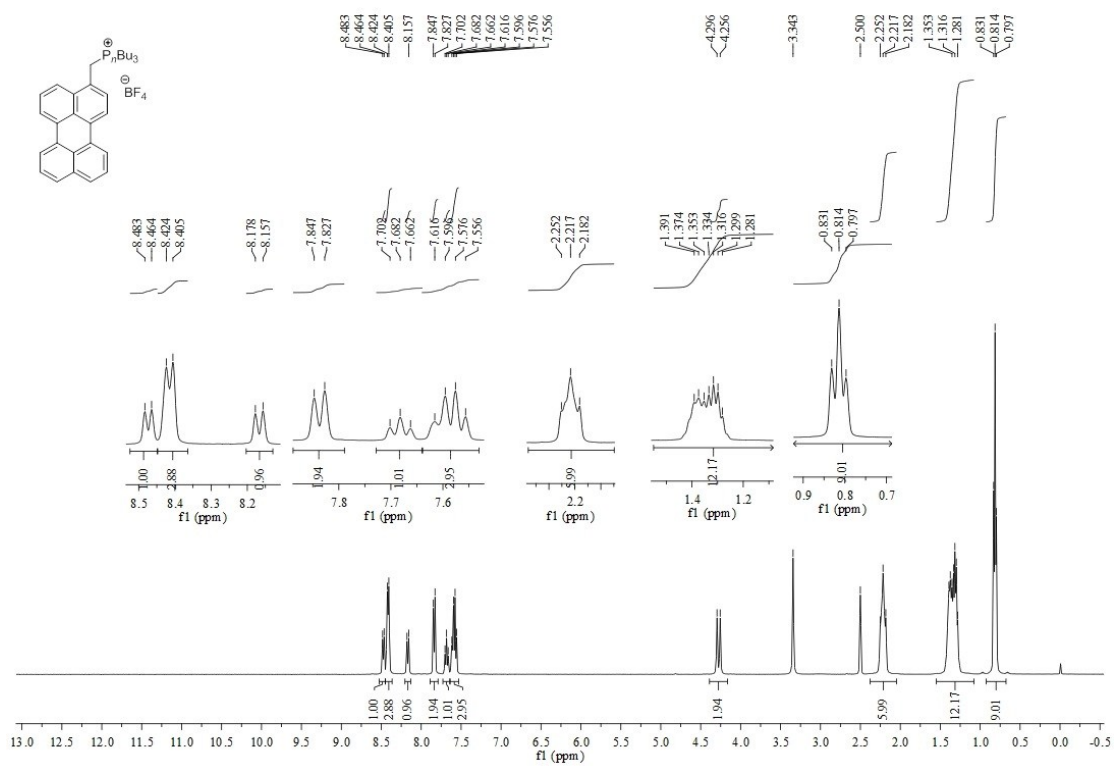

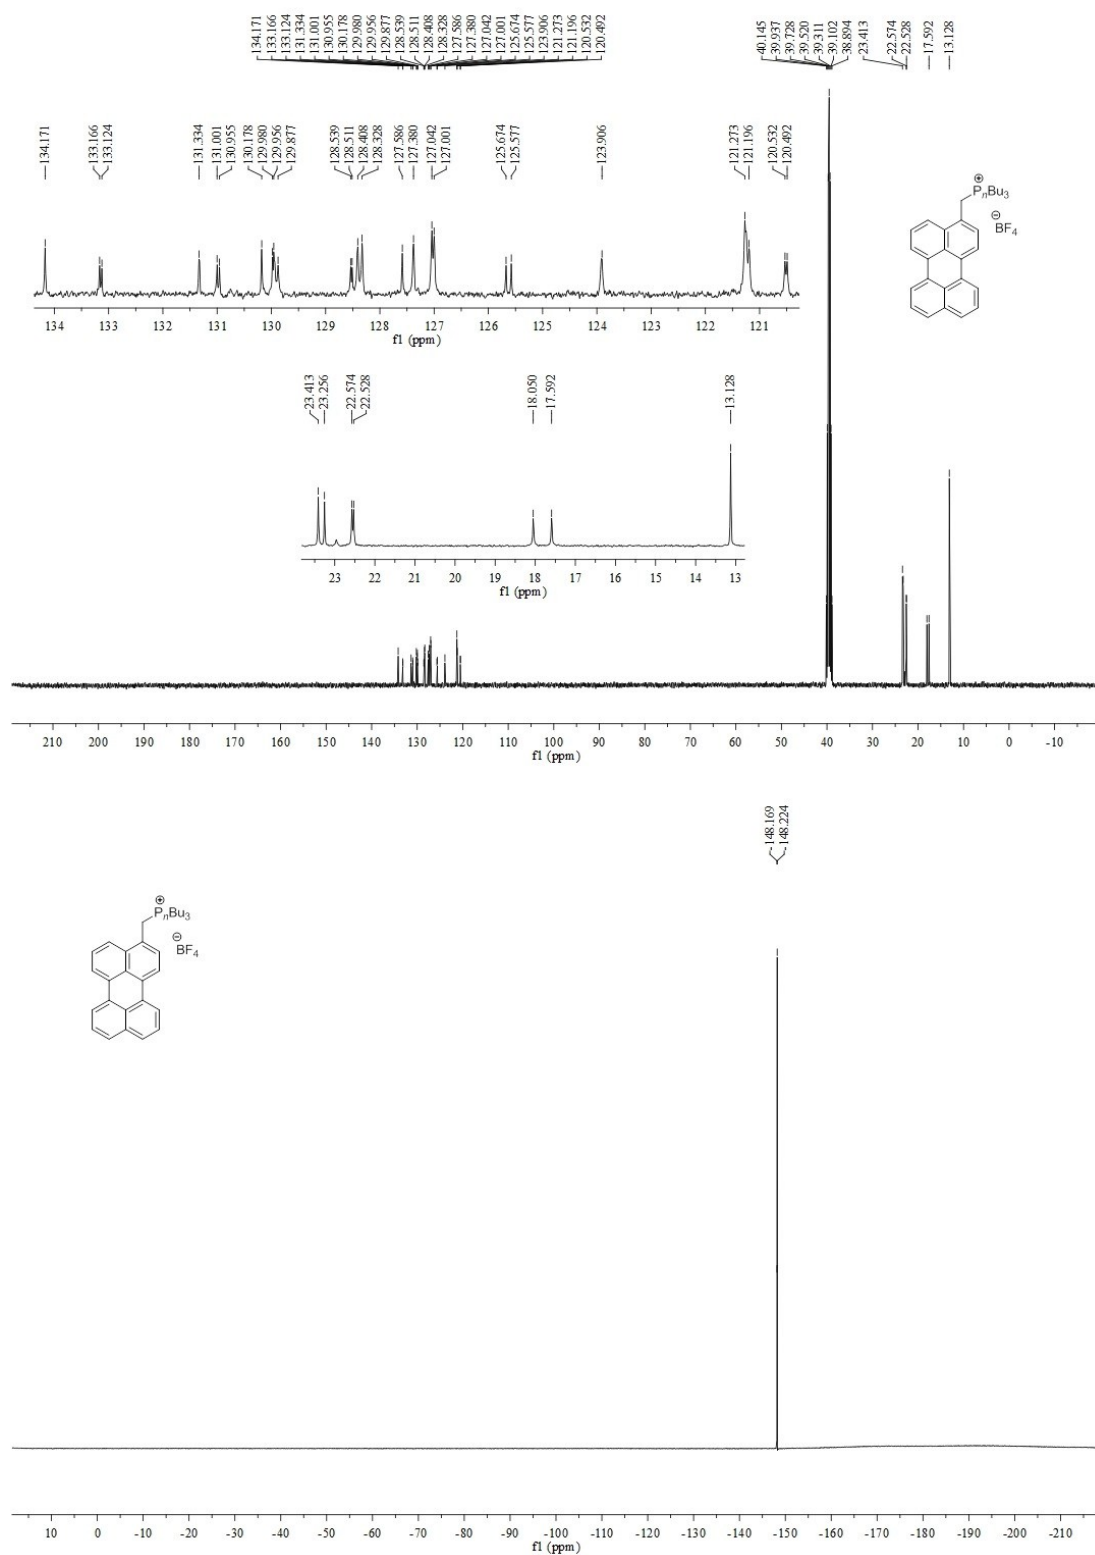

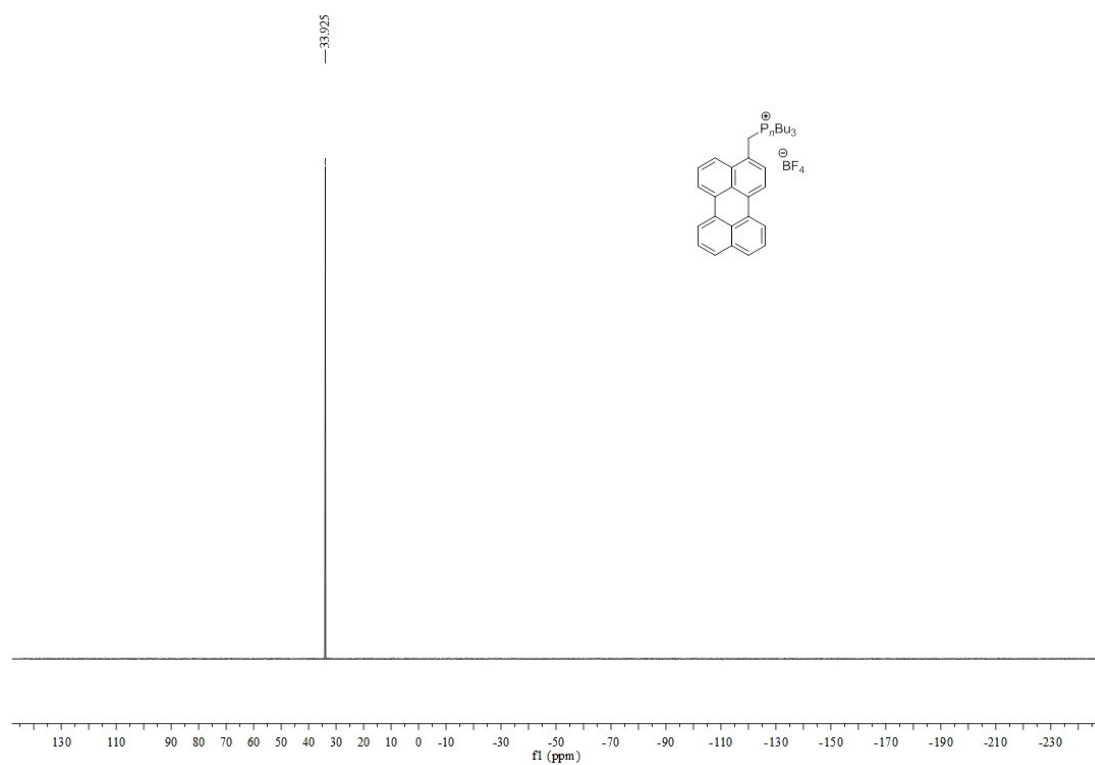

Supplement: c7tc02497e1.pdf [file c7tc02497e1.pdf]
